# Supplementary material
Source: HighWire-hosted journal article supplement (https://www.cmaj.ca/highwire/filestream/69455/field_highwire_adjunct_files/3/170880-res-4-at.pdf)
Supplement: 170880-res-4-at.pdf [file 170880-res-4-at.pdf]

**Appendix 4 (as supplied by the authors):** Odds of breastfeeding initiation in relation to household food insecurity status, sociodemographic characteristics, and mother's mood disorder and diabetes.<sup>a</sup>

|                                                | % that initiated breastfeeding | Odds Ratio (95% CL)             |                                 |                                 |                                 |
|------------------------------------------------|--------------------------------|---------------------------------|---------------------------------|---------------------------------|---------------------------------|
|                                                |                                | Unadjusted                      | Model 1 <sup>b</sup>            | Model 2 <sup>c</sup>            | Model 3 <sup>d</sup>            |
| <b>Household Food Insecurity Status</b>        |                                |                                 |                                 |                                 |                                 |
| Secure                                         | 91.6                           | 1.00                            | 1.00                            | 1.00                            | 1.00                            |
| Marginally Insecure                            | 88.8                           | 0.73 (0.51-1.06) <sup>†</sup>   | 1.11 (0.71-1.75)                | 1.15 (0.74-1.78)                | 1.11 (0.71-1.74)                |
| Moderately Insecure                            | 83.3                           | 0.46 (0.33-0.65) <sup>***</sup> | 0.81 (0.54-1.21)                | 0.84 (0.57-1.25)                | 0.81 (0.54-1.20)                |
| Severely Insecure                              | 86.0                           | 0.57 (0.31-1.06) <sup>†</sup>   | 1.27 (0.65-2.47)                | 1.38 (0.72-2.66)                | 1.27 (0.65-2.47)                |
| Age (/ year)                                   |                                |                                 | 0.99 (0.96-1.01)                | 0.99 (0.96-1.01)                | 0.99 (0.96-1.01)                |
| <b>Education, %</b>                            |                                |                                 |                                 |                                 |                                 |
| Post-Secondary Graduation                      |                                |                                 | 1.00                            | 1.00                            | 1.00                            |
| Less than Post-Secondary Graduation            |                                |                                 | 0.47 (0.36-0.62) <sup>***</sup> | 0.47 (0.36-0.62) <sup>***</sup> | 0.47 (0.36-0.62) <sup>***</sup> |
| <b>Partnership Status, %</b>                   |                                |                                 |                                 |                                 |                                 |
| Married/Common-Law                             |                                |                                 | 1.00                            | 1.00                            | 1.00                            |
| Single/Divorced/Separated/Widowed              |                                |                                 | 0.50(0.36-0.69) <sup>***</sup>  | 0.50 (0.36-0.70) <sup>***</sup> | 0.50 (0.36-0.69) <sup>***</sup> |
| <b>Immigrant Status, %</b>                     |                                |                                 |                                 |                                 |                                 |
| Non-Immigrant                                  |                                |                                 | 1.00                            | 1.00                            | 1.00                            |
| Immigrant                                      |                                |                                 | 2.41 (1.65-3.50) <sup>***</sup> | 2.35 (1.62-3.42) <sup>***</sup> | 2.40 (1.66-3.50) <sup>***</sup> |
| Number of children less than 18 yrs. (/child)  |                                |                                 | 0.87 (0.78-0.98) <sup>*</sup>   | 0.87 (0.78-0.98) <sup>*</sup>   | 0.87 (0.78-0.98) <sup>*</sup>   |
| Income, adjusted for household size (/ \$5000) |                                |                                 | 1.05 (1.02-1.08) <sup>***</sup> | 1.05 (1.02-1.08) <sup>***</sup> | 1.05 (1.02-1.08) <sup>***</sup> |
| <b>Aboriginal Identity, %</b>                  |                                |                                 |                                 |                                 |                                 |
| No                                             |                                |                                 | 1.00                            | 1.00                            | 1.00                            |
| Yes                                            |                                |                                 | 0.89 (0.48-1.63)                | 0.88 (0.48-1.61)                | 0.88 (0.48-1.63)                |
| <b>Mood Disorder, %</b>                        |                                |                                 |                                 |                                 |                                 |
| No                                             |                                |                                 |                                 | 1.00                            |                                 |
| Yes                                            |                                |                                 |                                 | 0.68 (0.47-1.00) <sup>*</sup>   |                                 |
| <b>Diabetes, %</b>                             |                                |                                 |                                 |                                 |                                 |
| No                                             |                                |                                 |                                 |                                 | 1.00                            |
| Yes                                            |                                |                                 |                                 |                                 | 1.20 (0.55-2.60)                |
| <b>Survey Year</b>                             |                                |                                 |                                 |                                 |                                 |
| 2005                                           |                                |                                 | 1.14 (0.74-1.77)                | 1.13 (0.73-1.75)                | 1.14 (0.74-1.76)                |
| 2007                                           |                                |                                 | 1.22 (0.80-1.87)                | 1.23 (0.80-1.89)                | 1.22 (0.80-1.87)                |
| 2008                                           |                                |                                 | 1.00                            | 1.00                            | 1.00                            |
| 2009                                           |                                |                                 | 1.66 (1.13-2.45)                | 1.65 (1.12-2.43)                | 1.66 (1.13-2.45) <sup>**</sup>  |
| 2010                                           |                                |                                 | 1.04 (0.66-1.63)                | 1.04 (0.66-1.62)                | 1.04 (0.66-1.63)                |

Appendix to: Orr SK, Dachner N, Frank L, et al. Relation between household food insecurity and breastfeeding in Canada. *CMAJ* 2018.

DOI:10.1503/cmaj.170880. Copyright © 2018 The Author(s) or their employer(s).

To receive this resource in an accessible format, please contact us at [cmajgroup@cmaj.ca](mailto:cmajgroup@cmaj.ca).

|      |                  |                  |                    |
|------|------------------|------------------|--------------------|
| 2011 | 1.26 (0.82-1.93) | 1.26 (0.82-1.93) | 1.26 (0.82-1.92)   |
| 2012 | 2.02 (1.29-3.16) | 2.00 (1.28-3.12) | 2.02 (1.29-3.16)** |
| 2013 | 1.69 (1.07-2.67) | 1.73 (1.10-2.72) | 1.69 (1.07-2.67)*  |
| 2014 | 1.28 (0.79-2.07) | 1.29 (0.80-2.09) | 1.28 (0.79-2.07)   |

<sup>a</sup> Rounded n=10,450. <sup>b</sup>

<sup>b</sup> Adjusted for age, education, partnership status, immigrant status, number of children < 18 yrs. of age, income adjusted for household size, Aboriginal identity and survey year.

<sup>c</sup> Model 1 plus adjustment for mood disorder.

<sup>d</sup> Model 1 plus adjustment for diabetes.

<sup>†</sup> p<0.10; \*p<0.05; \*\*p<0.01; \*\*\*p<0.001
